# Supplementary material
Source: PubMed Central journal article supplement (PMC3966505)
Supplement: peds.2013-3165_peds.2013-3165SupplementaryData.pdf [file peds.2013-3165_peds.2013-3165SupplementaryData.pdf]

## Supplemental Information

**SUPPLEMENTAL TABLE 4** ICD-9-CM Code Definitions for Pediatric Mental Health Diagnostic Groupings

| Grouping                                                                                 | ICD-9-CM Codes                                        |
|------------------------------------------------------------------------------------------|-------------------------------------------------------|
| Psychosis                                                                                | 290–295.95, 297–298.9                                 |
| Autism                                                                                   | 299–299.91                                            |
| Bipolar disorder                                                                         | 296–296.16, 296.4–296.89                              |
| Depression                                                                               | 296.2–296.39, 311, 300.4, 296.9–296.99                |
| Anxiety disorders                                                                        | 300–300.3, 300.5–300.9, 309.21, 309.81                |
| Personality disorders                                                                    | 301–301.9                                             |
| Sexuality disorders                                                                      | 302–302.9                                             |
| Substance abuse                                                                          | 303–305.93                                            |
| Eating disorders                                                                         | 307.1, 307.5–307.53                                   |
| Motor disorders                                                                          | 307.2–307.3                                           |
| Elimination disorders                                                                    | 307.6, 307.7, 787.6                                   |
| Reaction disorders                                                                       | 308–309.2, 309.22–309.8, 309.82–309.9                 |
| Externalizing disorders                                                                  | 312–313.82                                            |
| Attachment and nonspecified disorders of infancy, childhood, or adolescence <sup>a</sup> | 313.89, 313.9                                         |
| ADHD                                                                                     | 314–314.9                                             |
| Developmental disorder <sup>b</sup>                                                      | 315–315.9, 317–319                                    |
| Miscellaneous                                                                            | 307–307.0, 307.2–307.49, 307.7, 307.8, 310–310.9, 316 |

<sup>a</sup> This grouping is reactive attachment disorder (Disorders of Infancy, Childhood, Adolescence NOS).

<sup>b</sup> This disorder includes learning and communication disorders and intellectual disabilities.

**SUPPLEMENTAL TABLE 5** Summary Statistics for All Hospitalizations in the KID and PHIS Databases, 2009

|                         | National Inpatient (KID)<br>( <i>N</i> = 7 337 017) <sup>a</sup> | Freestanding Children's Hospitals<br>(PHIS) ( <i>N</i> = 678 801) |
|-------------------------|------------------------------------------------------------------|-------------------------------------------------------------------|
| Mean age, y             | 4.7                                                              | 5.7                                                               |
| Age, <i>n</i> (%)       |                                                                  |                                                                   |
| 0–2 years               | 4 997 817 (68.1)                                                 | 287 123 (42.3)                                                    |
| 3–5 years               | 237 605 (3.2) <sup>b</sup>                                       | 89 401 (13.2) <sup>b</sup>                                        |
| 6–11 years              | 399 832 (5.5) <sup>b</sup>                                       | 128 333 (19.0) <sup>b</sup>                                       |
| 12–17 years             | 758 549 (10.3) <sup>b</sup>                                      | 136 284 (20.1) <sup>b</sup>                                       |
| 18–20 years             | 943 214 (12.9) <sup>b</sup>                                      | 21 826 (3.2) <sup>b</sup>                                         |
| ≥21 years               | 0 (0)                                                            | 15 834 (2.3)                                                      |
| Female, <i>n</i> (%)    | 3 846 380 (52.6)                                                 | 311 774 (46.0)                                                    |
| Insurance, <i>n</i> (%) |                                                                  |                                                                   |
| Medicaid                | 3 566 754 (48.5)                                                 | 297 830 (43.9)                                                    |
| Private                 | 3 197 997 (43.5)                                                 | 230 763 (34.0)                                                    |
| Uninsured               | 342 392 (4.7)                                                    | 13 153 (1.9)                                                      |
| Other or unknown        | 251 183 (3.4)                                                    | 137 055 (20.2)                                                    |

<sup>a</sup> *N* = total weighted patients for KID (*n* = 3 390 841 unweighted visits).

<sup>b</sup> From these lines of data, we calculated the following summary statistic: Proportion of 3- to 20-year-old KID hospitalizations that are PHIS hospitalizations = 375 844/2 339 200 (16.1%).
